# Supplementary material
Source: PubMed Central journal article supplement (PMC9898120)
Supplement: NIHMS1852246-supplement-1.pdf [file NIHMS1852246-supplement-1.pdf]

# **BET Inhibitors Target the SCLC-N subtype of Small Cell Lung Cancer by Blocking NEUROD1 Transactivation**

By Chen et al.

## **Supplemental files**

### **Contents:**

1. Supplemental Methods
2. Supplemental Table S1. The list of the SCLC cell lines (N=52) used in this study.
3. Supplemental Table S2. The list of 384 genes that constitute the NEUROD1 gene signature.
4. Supplemental Table S3. The siRNA screen results in H446 and COR-L279 cells.
5. Supplemental Table S4. Sensitivity (IC50) of SCLC lines (N=52) to JQ1 and NHWD-870.
6. Supplemental Figure S1. Knockout of NEUROD1 by CRISPR in H446 cells.
7. Supplemental Figure S2. Validation of the H446 NEUROD1 ChIP-seq.
8. Supplemental Figure S3. BET bromodomain proteins interact with NEUROD1 in H524 cells.
9. Supplemental Figure S4. BRD4 interacts with ASCL1 in H1963 cells.
10. Supplemental Figure S5. NEUROD1 KO affects the BRD4 occupancy only in the genomic regions co-occupied by NEUROD1.
11. Supplemental Figure S6. Neuronal-related pathways are enriched among the NEUROD1-target genes in H446 cells.
12. Supplemental Figure S7. Validation of the NEUROD1 gene signature using the SCLC RNA-seq dataset in the CCLE.
13. Supplemental Figure S8. Effects of BETi on NEUROD1 gene expression in H446 cells.
14. Supplemental Figure S9. The NEUROD1- and BRD4-loaded SEs identified in H446 control and NEUROD1-KO cells and their correlation.
15. Supplemental Figure S10. The SCLC-N lines are more susceptible to BETi.
16. Supplemental Figure S11. NEUROD1 KO renders DMS-273 cells resistant to BETi.
17. Supplemental Figure S12. Effects of NEUROD1 KO on MYC expression and transactivation.
18. Supplemental Figure S13. LSAMP expression is regulated by both NEUROD1 and BET bromodomain proteins.
19. Supplemental Figure S14. Correlation between the IC50 values of NHWD-870 and JQ1 in SCLC cell lines (N=28).

## Supplemental Methods

**RNA Isolation and Quantitative real-time PCR Assay.** RNA was extracted from cells using an RNeasy Mini Kit (Qiagen), and cDNA was synthesized using an iScript cDNA Synthesis Kit (Bio-Rad). Quantitative gene expression analysis was performed on an ABI PRISM7500 real-time PCR system (ThermoFisher), using either TaqMan Fast Advanced Master Mix or SsoAdvanced™ Universal SYBR® Green Supermix (Biorad). The predesigned specific primers were purchased from ThermoFisher Scientific, Biorad, and Integrated DNA Technologies.

**ChIP-seq – Peak Calling.** An initial quality check of fastq files was performed using FastQC, and adapter sequences and low-quality base pairs were trimmed using Cutadapt. Trimmed reads were mapped to the human hg19 reference genome using the Backtrack algorithm of Burrows-Wheeler Aligner (BWA-Backtrack, RRID:SCR\_010910) (1). Duplicated reads were filtered, and the peaks were called using the Model-based Analysis of ChIP-Seq (MACS, RRID:SCR\_013291) with the corresponding input as control (2). Peaks of BRD2, BRD3, and BRD4 were called using default parameters, and NEUROD1 peak calling was performed using the parameters optimized for transcription factors (2). Genomic annotations of the NEUROD1 peaks were performed using the ‘annotatePeaks’ function of the Homer v4.11, RRID:SCR\_010881 (3).

**ChIP-seq – Metagene Analysis.** The metagene profile of the NEUROD1 peaks was performed using the ‘makeMetaGeneProfile’ function of the Homer, with the NEUROD1 peaks as the input.

**ChIP-seq – Peak Colocalization.** Tag directories were first generated from the bam files of ChIP-seq samples and the corresponding input, using the ‘makeTagDirectory’ function of the Homer. Histograms on BET proteins occupancy within 2.5 KB bilateral of the centers of NEUROD1 peaks were generated using Homer’s ‘annotatePeaks’ function with the parameter ‘-size 5000 -hist 10’. The results were plotted using the GraphPad Prism (v8.4.3).

**ChIP-seq – Heatmap.** BRD4 peaks colocalizing with NEUROD1 peaks were identified using Homer’s ‘mergePeaks’ function with the setting ‘-d given’. Peak annotation was performed using Homer’s ‘annotatePeaks’ function. The BRD4 peaks in the H446 control cells were separated into two

groups: those co-occupied by NEUROD1 and BRD4 and the others singly occupied by BRD4. The NEUROD1 or BRD4 occupancy near the BRD4 peaks was assessed using Homer's 'annotatePeaks' function, and the results were visualized in heatmaps using EaSeq (4).

**ChIP-seq – Superenhancer (SE) Analysis.** The H3K27Ac peaks were used to mark constituent enhancer sites in the H446 control cells and the NEUROD1-KO cells, and BRD4-loaded or NEUROD1-loaded SEs were called by ROSE (RRID:SCR\_017390) using the default setting (5, 6). The identified SEs were annotated for the nearest genes using Homer's 'annotatePeaks' function.

**ChIP-seq – de novo Motif Discovery.** Motif discovery was performed using the 'findMotifsGenome' function of the Homer, with the setting of '-size 200 -mask' and the NEUROD1 peaks as the input.

**Identification of NEUROD1-Target Genes.** The NEUROD1 target genes were identified using the Binding and Expression Target Analysis (BETA, RRID:SCR\_005396) algorithm (7). Input data were the NEUROD1 peaks identified from MACS and differential gene expression output from Limma (H446 NEUROD1-KO cells vs. control cells). The analysis was performed with the 'Plus' option in the setting of '--df 0.05 --bl --da 0.5'.

**Western Blot Analysis.** Whole-cell lysates were extracted using RIPA lysis buffer (Millipore), and membrane proteins were isolated using a Mem-PER Plus Membrane Protein Kit (ThermoFisher). Western blots were performed using a standard immunoblotting protocol. The antibodies and their dilutions were: NEUROD1 (BD Biosciences, #563000; RRID:AB\_2737942; 1:2,000), BRD2 (Santa Cruz Biotechnology, #sc-393720; RRID:AB\_430777; 1:200), BRD3 (Santa Cruz Biotechnology, #sc-81202; RRID: AB\_1119692; 1:200), BRD4 (Novus, NBP2-52959, 1:1,000), LSAMP (Abcam, #ab89719, RRID:AB\_2138207; 1:1,000), NaK-ATPase (Santa Cruz Biotechnology, #sc-71638, RRID:AB\_1125500; 1:1,000), cleaved caspase 3 (Cell Signaling Technology, #9661, RRID:AB\_2341188; 1:1,000), caspase 3 (Cell Signaling Technology, #9662, RRID:AB\_331439; 1:1,000), cleaved caspase 9 (Cell Signaling Technology, #7237, RRID:AB\_10895832; 1:1,000), caspase 9 (Cell Signaling Technology, #9502, RRID:AB\_2068621; 1:1,000), Phos-ERK1/2 (Cell Signaling Technology, #9101, RRID:AB\_331646; 1:1,000), ERK1/2 (Cell Signaling Technology, #9102, RRID:AB\_330744; 1:2,000), MYC (Cell Signaling Technology, #5605, RRID:AB\_1903938; 1:1,000),  $\gamma$ -tubulin (Sigma, #T6557, RRID:AB\_477584; 1:10,000).

**Co-immunoprecipitation (Co-IP) Assays.** Nuclear extracts were prepared from H446, H524, and H1963 cells using a Nuclear Complex Co-IP Kit (Active Motif, #54001). Each IP, in a final volume of 500  $\mu$ l, contained 200-500  $\mu$ g nuclear extract, an antibody against the protein of interest ( $\alpha$ BRD4, Bethyl, A301-985A, RRID:AB\_1576498, 5  $\mu$ g;  $\alpha$ NEUROD1, Cell Signaling Technology, #4373, RRID:AB\_10549071, 10  $\mu$ l;  $\alpha$ BRD2, Cell Signaling Technology, #5848, RRID:AB\_10835146, 10  $\mu$ l;  $\alpha$ ASCL1, BD Biosciences, #556604, RRID:AB\_396479, 5  $\mu$ g) or control IgG (Cell Signaling Technology, #3900, RRID:AB\_1550038, 5  $\mu$ g), 20  $\mu$ l slurry of Magna ChIP protein A magnetic beads or Magna ChIP protein G magnetic beads, Millipore), and 1x IP High buffer from the Nuclear Complex Co-IP Kit supplemented with a protease inhibitor cocktail (Sigma). After overnight mixing on an orbital shaker at 4°C, antibody/antigen/bead complexes were washed three times with 1x High Buffer supplemented with 1mg/ml bovine serum albumin (BSA), followed by three washes with 1x High Buffer without BSA. The immunoprecipitated protein complexes were eluted by mixing the washed beads with Laemmli buffer supplemented with 5% 2-mercaptoethanol (Sigma) after heating at 95 °C for 5 min. The presence of the protein of interest was detected by western blot.

**Cell Proliferation Assay and Viability Assay.** After trypsinization, cell suspensions were passed through 40  $\mu$ m cell strainers. Five thousand cells in 100  $\mu$ l growth media were seeded into each well of a 96-well white plate with a clear bottom (Corning, #3610). Alternatively, 750 cells in 15  $\mu$ l were seeded into each well of a 384-well white plate with a clear bottom (Corning, #3765).

For cell proliferation assay, cell viability was checked the next day (D1) and then every two days using CellTiter-Glo® 2.0 Reagent (Promega). A reflective foil seal (Bio-Rad, #MSF1001) was applied to the bottom of each plate to maximize the signal. The results were normalized to the reading on day 1. Four replicates were used for each data point.

For cell viability assay, JQ1 (Sigma), OTX-015 (Selleckchem) or NHWD-870 (a kind gift from Nenghui Wang) were serially diluted 2-fold in DMSO to generate nine consecutive concentrations. The compounds were first diluted 100 times in culture media, and the diluted drug solution was then delivered to the cells at 10% of the final volume to achieve a total of 1,000-time dilutions. After brief mixing, cells were incubated for 72 hours before cell viability was measured. Four replicates were used for each dose of drug treatment.

**MYC reporter assay.** An MYC Firefly luciferase reporter (pBV-Luc wt MBS1-4, Addgene plasmid #16564, RRID:Addgene\_16564; a gift from Bert Vogelstein (8)) and a Renilla reporter (pRL-CMV; Promega) were transfected into H446 NEUROD1-KO and control cells at 8:1 ratio by lipofection. One day after transfection, the cells were trypsinized and seeded into a 384-well plate at 750 cells per well, and JQ1 treatment was administered subsequently. The Firefly and Renilla luciferase activities were measured at 24- and 48-hour intervals using a Dual-Glo Luciferase assay system (Promega). Four replicates were used for each dose.

### References:

1. Li H, Durbin R. Fast and accurate short read alignment with Burrows-Wheeler transform. *Bioinform* 2009;25:1754-1760.
2. Zhang Y, Liu T, Meyer CA, Eeckhoute J, Johnson DS, Bernstein BE, et al. Model-based Analysis of ChIP-Seq (MACS). *Genome Biol* 2008;9:R137.
3. Heinz S, Benner C, Spann N, Bertolino E, Lin YC, Laslo P, et al. Simple combinations of lineage-determining transcription factors prime cis-regulatory elements required for macrophage and B cell identities. *Mol Cell* 2010;38:576-589.
4. Lerdrup M, Johansen JJ, Agrawal-Singh S, Hansen K. An interactive environment for agile analysis and visualization of ChIP-sequencing data. *Nat Struct Mol Biol*. 2016, 23:349-357.
5. Lovén J, Hoke HA, Lin CY, Lau A, Orlando DA, Vakoc C, et al. Selective inhibition of tumor oncogenes by disruption of super-enhancers. *Cell* 2013;153:320-334.
6. Whyte Warren A, Orlando DA, Hnisz D, Abraham BJ, Lin CY, Kagey MH, et al. Master transcription factors and mediator establish super-enhancers at key cell identity genes. *Cell* 2013;153:307-319.
7. Wang S, Sun H, Ma J, Zang C, Wang C, Wang J, et al. Target analysis by integration of transcriptome and ChIP-seq data with BETA. *Nat Protoc* 2013;8:2502-2515.
8. Hermeking H, Rago C, Schuhmacher M, Li Q, Barrett JF, O'Byrne AJ, et al. Identification of CDK4 as a target of c-MYC. *Proc Natl Acad Sci USA* 2000;97:2229-2234.

**Supplemental Table S1. The list of the SCLC cell lines (N=52) used in this study.**

| Cell Line | RRID      | Subtype | Source*       | Catalog #   | Growth media                     |
|-----------|-----------|---------|---------------|-------------|----------------------------------|
| COLO-668  | CVCL_1128 | ASCL1   | Sigma-Aldrich | 87061209    | RPMI + 10% FBS                   |
| COR-L47   | CVCL_2415 | ASCL1   | Sigma-Aldrich | 92031915    | RPMI + 10% FBS                   |
| COR-L88   | CVCL_1141 | ASCL1   | Sigma-Aldrich | 92031917    | RPMI + 10% FBS                   |
| DMS 454   | CVCL_2438 | ASCL1   | Sigma-Aldrich | 95062832    | Waymouth + 1x glutamax + 10% FBS |
| DMS 53    | CVCL_1177 | ASCL1   | ATCC          | CRL-2062    | RPMI + 10% FBS                   |
| DMS 79    | CVCL_1178 | ASCL1   | Sigma-Aldrich | 95062824    | RPMI + 10% FBS                   |
| H1092     | CVCL_1454 | ASCL1   | ATCC          | CRL-5855    | HITES <sup>†</sup> + 5% FBS      |
| H1105     | CVCL_1455 | ASCL1   | ATCC          | CRL-5856    | HITES <sup>†</sup> + 5% FBS      |
| H1417     | CVCL_1469 | ASCL1   | ATCC          | CRL-5872    | RPMI + 10% FBS                   |
| H1436     | CVCL_1471 | ASCL1   | ATCC          | CRL-5871    | HITES <sup>†</sup> + 5% FBS      |
| H146      | CVCL_1473 | ASCL1   | ATCC          | HTB-173     | RPMI + 10% FBS                   |
| H1836     | CVCL_1498 | ASCL1   | ATCC          | CRL-5898    | HITES <sup>†</sup> + 5% FBS      |
| H187      | CVCL_1501 | ASCL1   | ATCC          | CRL-5804    | RPMI + 10% FBS                   |
| H1876     | CVCL_1503 | ASCL1   | ATCC          | CRL-5902    | HITES <sup>†</sup> + 5% FBS      |
| H1882     | CVCL_1504 | ASCL1   | ATCC          | CRL-5903    | HITES <sup>†</sup> + 5% FBS      |
| H1930     | CVCL_1507 | ASCL1   | ATCC          | CRL-5906    | RPMI + 10% FBS                   |
| H1963     | CVCL_1510 | ASCL1   | ATCC          | CRL-5982    | RPMI + 10% FBS                   |
| H2029     | CVCL_1516 | ASCL1   | ATCC          | CRL-5913    | HITES <sup>†</sup> + 5% FBS      |
| H2081     | CVCL_1522 | ASCL1   | ATCC          | CRL-5920    | HITES <sup>†</sup> + 5% FBS      |
| H209      | CVCL_1525 | ASCL1   | ATCC          | HTB-172     | RPMI + 10% FBS                   |
| H2107     | CVCL_1527 | ASCL1   | ATCC          | CRL-5983_FL | HITES <sup>†</sup> + 5% FBS      |
| H2141     | CVCL_2653 | ASCL1   | ATCC          | CRL-5927    | HITES <sup>†</sup> + 5% FBS      |
| H2196     | CVCL_1539 | ASCL1   | ATCC          | CRL-5932    | HITES <sup>†</sup> + 5% FBS      |
| H2227     | CVCL_1542 | ASCL1   | ATCC          | CRL-5934    | HITES <sup>†</sup> + 5% FBS      |
| H345      | CVCL_1558 | ASCL1   | ATCC          | HTB-180     | HITES <sup>†</sup> + 5% FBS      |
| H378      | CVCL_1560 | ASCL1   | ATCC          | CRL-5808    | RPMI + 10% FBS                   |
| H510A     | CVCL_1565 | ASCL1   | ATCC          | HTB-184     | F12K + 10% FBS                   |
| H64       | CVCL_1573 | ASCL1   | ATCC          | CRL-5976    | HITES <sup>†</sup> + 5% FBS      |
| H69       | CVCL_1579 | ASCL1   | ATCC          | HTB-119     | RPMI + 10% FBS                   |

| Cell Line | Subtype   | Source* | Catalog #     | Growth media <sup>†</sup> |                                  |
|-----------|-----------|---------|---------------|---------------------------|----------------------------------|
| H889      | CVCL_1598 | ASCL1   | ATCC          | CRL-5817                  | RPMI + 10% FBS                   |
| HCC-33    | CVCL_2058 | ASCL1   | ATCC          | ACC 487                   | RPMI + 20% FBS                   |
| COR-L279  | CVCL_1140 | NEUROD1 | Sigma-Aldrich | 96020724                  | RPMI + 10% FBS                   |
| CPC-N     | CVCL_1146 | NEUROD1 | DSMZ          | ACC 306                   | McCoy's 5A + 10% FBS             |
| DMS 273   | CVCL_1176 | NEUROD1 | Sigma-Aldrich | 95062830                  | Waymouth + 1x glutamax + 10% FBS |
| H1694     | CVCL_1489 | NEUROD1 | ATCC          | CRL-5888                  | HITES <sup>†</sup> + 5% FBS      |
| H2066     | CVCL_1520 | NEUROD1 | ATCC          | CRL-5917                  | HITES <sup>†</sup> + 5% FBS      |
| H2171     | CVCL_1536 | NEUROD1 | ATCC          | CRL-5929                  | HITES <sup>†</sup> + 5% FBS      |
| H446      | CVCL_1562 | NEUROD1 | ATCC          | HTB-171                   | RPMI + 10% FBS                   |
| H524      | CVCL_1568 | NEUROD1 | ATCC          | CRL-5831                  | RPMI + 10% FBS                   |
| H82       | CVCL_1591 | NEUROD1 | ATCC          | HTB-175                   | RPMI + 10% FBS                   |
| SCLC-21H  | CVCL_0024 | NEUROD1 | DSMZ          | ACC 372                   | DMEM + 10% FBS                   |
| SCLC-22H  | CVCL_2186 | NEUROD1 | DSMZ          | ACC 373                   | DMEM + 10% FBS                   |
| COR-L311  | CVCL_2412 | POU2F3  | Sigma-Aldrich | 96020721                  | RPMI + 10% FBS                   |
| H1048     | CVCL_1453 | POU2F3  | ATCC          | CRL-5853                  | HITES <sup>†</sup> + 5% FBS      |
| H211      | CVCL_1529 | POU2F3  | ATCC          | CRL-5824                  | RPMI + 10% FBS                   |
| H526      | CVCL_1569 | POU2F3  | ATCC          | CRL-5811                  | RPMI + 10% FBS                   |
| DMS 114   | CVCL_1174 | YAP1    | ATCC          | CRL-2066                  | Waymouth + 1x glutamax + 10% FBS |
| H1341     | CVCL_1463 | YAP1    | ATCC          | CRL-5864                  | ACL-4 <sup>†</sup> + 5% FBS      |
| H196      | CVCL_1509 | YAP1    | ATCC          | CRL-5823                  | RPMI + 10% FBS                   |
| H841      | CVCL_1595 | YAP1    | ATCC          | CRL-5845                  | HITES <sup>†</sup> + 5% FBS      |
| SBC3      | CVCL_1678 | YAP1    | JCRB          | JCRB0818                  | EMEM + 10% FBS                   |
| SBC5      | CVCL_1679 | YAP1    | JCRB          | JCRB0819                  | EMEM + 10% FBS                   |

\*ATCC, American Type Culture Collection; DSMZ, German Collection of Microorganisms and Cell Cultures; JCRB, Japanese Collection of Research Bioresources Cell Bank.

<sup>†</sup> HITES contains DMEM:F12 medium (ATCC, #30-2006; 500 ml), Insulin (Sigma, #I1882; 0.005mg/ml), apo-transferrin (Sigma, #T5391 or T1428; 0.01 mg/ml), sodium selenite (Sigma, #S9133; 30 nM), hydro-cortisone (Sigma, #H0135; 10nM),  $\beta$ -estradiol (Sigma, #E2257; 10nM), glutamax (Gibco, #35050-061; 1x).

<sup>†</sup> ACL4 contains DMEM:F12 medium (ATCC, #30-2006; 500 ml), insulin (Sigma, #I1882; 0.02mg/ml), apo-transferrin (Sigma, #T5391 or T1428; 0.01 mg/ml), sodium selenite (Sigma, #S9133; 25 nM), hydrocortisone (Sigma, #H0135; 50nM), EGF (Sigma, #SRP3027; 1ng/ml), glutamax (Gibco, #35050-061; 1x), ethanolamine (Sigma, #E0135; 0.01mM), phosphorylethanolamine (Sigma, #P0503; 0.01mM), triiodothyronine (Sigma, #T6397; 100pM), HEPES (Sigma, #H0887; 10mM), sodium pyruvate (Gibco, #11360-070; 0.5mM).

**Supplemental Table S2. The list of 384 genes that constitute the NEUROD1 gene signature.**

|          |           |           |           |          |           |           |            |          |           |              |
|----------|-----------|-----------|-----------|----------|-----------|-----------|------------|----------|-----------|--------------|
| NELL1    | STAB2     | LBX1-AS1  | COLCA2    | KCNJ3    | PROX1     | FGF12     | PPP1R16B   | FGD4     | SHF       | KCNC4-AS1    |
| GLI2     | AMER3     | TOX3      | RASSF5    | VWC2     | C1orf194  | CCSER1    | NAALADL2   | KIAA0408 | NRSN1     | NAALADL2-AS2 |
| LRRTM2   | C6orf99   | STK32A    | MEGF10    | LRTM2    | FRMD3     | GPR19     | STARD13-AS | TACR2    | WSCD1     | MAMDC2-AS1   |
| LRRN1    | LINC00907 | ANKRD33B  | OTOR      | KCNH2    | JAKMIP2   | NEUROD2   | LINC00940  | TSPAN15  | HES6      | WWTR1-AS1    |
| ALPL     | CHODL     | C1orf220  | MLLT4-AS1 | RHBDL3   | PCSK1     | KLHL32    | LINC00989  | CERKL    | RPRML     |              |
| RHOJ     | RXRG      | DOK5      | BMF       | THRSP    | NEUROD1   | RIPPLY2   | SEC16B     | RAB39A   | CAMK4     |              |
| ACE      | IGDCC3    | ITGA9     | HEPACAM2  | WNT16    | GPR68     | P4HA2     | CXCL11     | EDA      | CPLX2     |              |
| SYK      | AKNAD1    | IGSF21    | KCNH6     | L1CAM    | KCND3     | LINC00052 | ENC1       | GNG4     | GRIA2     |              |
| ROBO4    | SLC18A1   | KLF1      | USH1G     | ARHGEF28 | ONECUT2   | DUSP5     | MAMDC2     | CBFA2T3  | LINC00948 |              |
| DACT1    | TMEM179   | C1QTNF7   | TMEM178A  | ZNF704   | RFPL1S    | KALRN     | CPO        | CORO2B   | ARHGAP15  |              |
| TAGAP    | PTPRT     | CELF2     | NES       | SLC18A3  | HNMT      | NPTXR     | ENHO       | VWC2L    | TMEM132A  |              |
| FNDC1    | MGAT5B    | KIAA1462  | CXCL12    | DCHS1    | INA       | ADRA2A    | CXADR      | PAK1     | PHACTR3   |              |
| VWA5B2   | CNBD2     | HCN1      | FHL5      | FIGF     | OAS3      | SSTR2     | RUNDC3A    | AK5      | ZDHC22    |              |
| EXOC3L1  | PWWP2B    | FRMPD4    | PHACTR2   | CKMT1A   | DRD2      | SLCO4C1   | OAS1       | PCSK2    | SNCAIP    |              |
| RASGRP1  | IL12RB1   | PRELP     | S100A5    | SNTG1    | PGBD5     | CLSTN2    | STMN3      | LRP8     | PRKG2     |              |
| CDH20    | PHACTR1   | LINC00087 | CACNA2D4  | PCDH8    | KCNH8     | ATOH8     | SH3GL2     | HS3ST5   | CBFA2T2   |              |
| WSCD2    | OTOGL     | TUBA3FP   | PTCHD2    | NTF3     | NYAP2     | ADAMTS14  | HRH3       | KCTD16   | MARCH4    |              |
| VEPH1    | SLC6A17   | ISLR2     | SLC6A3    | MC5R     | KIAA1324  | NAA11     | GRIK2      | VLDLR    | UNC13C    |              |
| ALOX5    | RAB37     | RTBDN     | SEMA5B    | STARD13  | GRIK3     | DCX       | FLRT3      | LRRN2    | OPRD1     |              |
| IQSEC3   | ZC2HC1B   | COL16A1   | SYNGR4    | VPS37D   | ADAM11    | TLE6      | C8orf46    | COL19A1  | CBLN1     |              |
| KCNF1    | FCN2      | ADCYAP1R1 | ADAMTS5   | KCNAB1   | LINC00642 | MAP6      | BAI2       | KIAA1456 | KCNB2     |              |
| SPOCK3   | GDNF      | TMEM151B  | KCTD12    | POU2AF1  | MAPT      | RASL11B   | LINC00348  | GABRP    | STRADB    |              |
| HK3      | DUOX1     | SLC6A11   | MYO7A     | NXP2     | GOLGA7B   | RNF112    | ANKRD30B   | FOXO6    | CHGB      |              |
| FAM181B  | LAMC2     | CDH15     | KCNC2     | RALYL    | CNR1      | BCAN      | LINC00951  | SRRM4    | LPPR1     |              |
| S100A3   | FAM78B    | NEUROD4   | PTX3      | GALNT5   | CABP7     | HLF       | XKR7       | GLCE     | NAPB      |              |
| C15orf59 | LRRC10B   | LBX1      | PPP1R17   | KCNS2    | TMEM63C   | SYTL3     | SYNPR      | CAMKK1   | STX1A     |              |
| LRMP     | OLFML3    | OLFM1     | PRIMA1    | PDZD4    | NYNRIN    | C11orf53  | RTN1       | PRDM8    | OLFM3     |              |
| HIF3A    | PPP1R14A  | HTR1B     | CCM2L     | SYNGR1   | GADD45G   | TESC      | KIF1A      | GOLGA7B  | FAM19A5   |              |
| BAI1     | SYT14     | ELMO1     | CRYM      | MFAP4    | ACSL6     | ASXL3     | GPR12      | TMOD2    | DCC       |              |
| FOXP4    | SPHKAP    | SLC4A10   | OLFM4     | GPR112   | SNCB      | C1orf95   | TDRG1      | DISC1    | STXBP5L   |              |
| EGFEM1P  | FAM196A   | NTRK1     | CNTN2     | MRAP2    | SYN2      | KCNMB4    | RELL1      | CHD5     | ST8SIA3   |              |
| DYSF     | ACE2      | APCDD1    | SYNDIG1   | MPPED1   | IGSF11    | PPM1L     | EIF4E1B    | PREX1    | NPTX1     |              |
| SYT4     | FRMPD3    | WDR72     | TEX35     | FAT3     | ARPP21    | TPH2      | COLCA1     | UNC5A    | CRMP1     |              |
| WNT5A    | CDCP1     | SAG       | ASPDH     | TCF15    | FUT9      | SOX5      | FBLL1      | SYT2     | CHGA      |              |
| GAP43    | PAPPA2    | MYOZ3     | RAP1GAP   | SLC15A3  | SNAP91    | XKR4      | BAI3       | CSRNP3   | NXP1      |              |
| TSHZ2    | VSTM4     | KIAA1549L | SPTBN4    | GPR111   | KCNH7     | CDH7      | ARHGEF3    | STMN2    | GNAO1     |              |
| CRHR1    | SYT6      | CXCR4     | LINC01088 | S100A4   | CKMT1B    | GPR85     | PLD5       | C1orf87  | SCG3      |              |
| MYBPHL   | SPON2     | RLN1      | ANGPTL1   | LURAP1L  | GNAZ      | GK2       | PDE9A      | RPH3A    | KIAA1614  |              |



**Supplemental Table S3. The siRNA screen results in H446 and COR-L279 cells.** The averages show the cell numbers of the siRNA-treated samples relative to non-targeting siRNA control. Stdev shows the standard deviation of three replicates.

| Target       | H446         |              |              |              | COR-L279     |              |              |              |
|--------------|--------------|--------------|--------------|--------------|--------------|--------------|--------------|--------------|
|              | siRNA 1      |              | siRNA 2      |              | siRNA 1      |              | siRNA 2      |              |
|              | Average      | Stdev        | Average      | Stdev        | Average      | Stdev        | Average      | Stdev        |
| BLNK         | 0.667        | 0.037        | 0.682        | 0.019        | 0.269        | 0.024        | 0.881        | 0.024        |
| TSPAN18      | 0.562        | 0.028        | 0.974        | 0.034        | 0.408        | 0.017        | 0.952        | 0.021        |
| SHISA9       | 1.354        | 0.081        | 1.021        | 0.074        | 1.004        | 0.047        | 0.809        | 0.014        |
| MC5R         | 0.388        | 0.041        | 0.938        | 0.023        | 0.222        | 0.007        | 0.780        | 0.010        |
| PHEX         | 1.306        | 0.104        | 0.875        | 0.108        | 1.107        | 0.035        | 0.543        | 0.017        |
| ANK2         | 0.761        | 0.036        | 0.440        | 0.021        | 0.801        | 0.040        | 0.335        | 0.027        |
| FRMD4A       | 1.163        | 0.033        | 0.761        | 0.030        | 1.079        | 0.045        | 0.689        | 0.010        |
| ARHGEF28     | 0.912        | 0.057        | 1.319        | 0.026        | 1.185        | 0.060        | 1.157        | 0.062        |
| GPR68        | 0.989        | 0.073        | 0.436        | 0.026        | 1.505        | 0.027        | 0.273        | 0.003        |
| SEMA5B       | 0.799        | 0.036        | 1.172        | 0.155        | 0.830        | 0.009        | 1.101        | 0.021        |
| SLC9A9       | 0.989        | 0.041        | 0.573        | 0.021        | 0.319        | 0.007        | 0.590        | 0.027        |
| GAS2         | 0.889        | 0.026        | 0.973        | 0.026        | 0.883        | 0.029        | 0.876        | 0.029        |
| PTPRZ1       | 0.585        | 0.026        | 0.741        | 0.070        | 0.153        | 0.011        | 0.788        | 0.029        |
| HNMT         | 0.711        | 0.069        | 1.404        | 0.080        | 0.678        | 0.048        | 1.276        | 0.063        |
| COL16A1      | 0.714        | 0.068        | 1.094        | 0.076        | 0.570        | 0.033        | 0.872        | 0.053        |
| NDP          | 0.903        | 0.108        | 0.892        | 0.065        | 0.797        | 0.028        | 0.939        | 0.028        |
| CNR1         | 0.992        | 0.055        | 1.134        | 0.120        | 1.135        | 0.022        | 0.956        | 0.032        |
| TTC30B       | 0.536        | 0.051        | 1.059        | 0.048        | 0.367        | 0.017        | 1.157        | 0.096        |
| <b>LSAMP</b> | <b>0.794</b> | <b>0.064</b> | <b>0.701</b> | <b>0.019</b> | <b>0.717</b> | <b>0.065</b> | <b>0.403</b> | <b>0.014</b> |
| BRINP1       | 1.165        | 0.033        | 0.560        | 0.038        | 0.856        | 0.024        | 0.579        | 0.010        |
| CORO2B       | 1.126        | 0.078        | 1.097        | 0.028        | 1.011        | 0.030        | 0.487        | 0.028        |
| COL8A2       | 1.075        | 0.019        | 0.417        | 0.035        | 1.185        | 0.135        | 0.420        | 0.012        |
| CDH5         | 1.098        | 0.020        | 1.212        | 0.051        | 0.785        | 0.032        | 1.304        | 0.039        |
| COL19A1      | 0.672        | 0.011        | 0.757        | 0.025        | 0.470        | 0.026        | 0.358        | 0.014        |
| ROBO2        | 1.014        | 0.031        | 0.591        | 0.013        | 1.053        | 0.048        | 0.221        | 0.004        |
| VLDLR        | 0.738        | 0.096        | 0.579        | 0.092        | 0.299        | 0.030        | 0.181        | 0.028        |
| CERKL        | 1.125        | 0.080        | 1.305        | 0.048        | 1.044        | 0.020        | 1.274        | 0.045        |
| SLC15A3      | 0.633        | 0.027        | 0.368        | 0.015        | 0.182        | 0.009        | 0.475        | 0.036        |
| TACR2        | 0.360        | 0.004        | 0.717        | 0.059        | 0.269        | 0.006        | 0.718        | 0.069        |
| LRRN2        | 0.370        | 0.033        | 0.580        | 0.026        | 0.189        | 0.008        | 0.521        | 0.016        |
| GABRA1       | 1.049        | 0.079        | 0.913        | 0.043        | 1.274        | 0.028        | 0.704        | 0.025        |
| ARHGAP15     | 1.135        | 0.058        | 0.986        | 0.055        | 1.288        | 0.079        | 0.985        | 0.020        |
| MYT1L        | 0.974        | 0.041        | 0.140        | 0.008        | 0.951        | 0.022        | 0.189        | 0.022        |
| PHACTR3      | 1.246        | 0.041        | 1.023        | 0.057        | 0.854        | 0.034        | 0.958        | 0.033        |
| FREM1        | 1.161        | 0.060        | 0.809        | 0.071        | 1.117        | 0.020        | 0.387        | 0.023        |
| FAM19A5      | 0.986        | 0.079        | 1.094        | 0.050        | 0.816        | 0.024        | 1.191        | 0.028        |
| CHRNA3       | 0.621        | 0.031        | 0.634        | 0.016        | 0.562        | 0.031        | 1.107        | 0.040        |
| FAM181B      | 0.446        | 0.008        | 0.735        | 0.014        | 0.464        | 0.011        | 0.794        | 0.008        |
| ST18         | 1.068        | 0.075        | 0.558        | 0.024        | 0.987        | 0.052        | 0.293        | 0.018        |
| GRIK3        | 0.544        | 0.048        | 0.730        | 0.018        | 0.608        | 0.016        | 0.645        | 0.010        |
| CA10         | 0.998        | 0.059        | 1.004        | 0.060        | 0.772        | 0.050        | 1.284        | 0.054        |
| OAS1         | 0.522        | 0.060        | 0.643        | 0.020        | 0.334        | 0.012        | 0.478        | 0.039        |
| RPH3A        | 0.743        | 0.063        | 1.194        | 0.066        | 0.719        | 0.030        | 0.964        | 0.009        |
| SEZ6L        | 1.146        | 0.043        | 1.025        | 0.044        | 1.337        | 0.034        | 0.753        | 0.021        |
| SYT4         | 0.927        | 0.034        | 0.100        | 0.018        | 0.255        | 0.014        | 0.259        | 0.017        |

**Supplemental Table S4. Sensitivity (IC<sub>50</sub>) of SCLC lines (N=52) to JQ1 and NHWD-870.**

| Cell Line | JQ1 IC <sub>50</sub> (μM) | NHWD-870 IC <sub>50</sub> (μM) | Cell Line | JQ1 IC <sub>50</sub> (μM) | NHWD-870 IC <sub>50</sub> (μM) |
|-----------|---------------------------|--------------------------------|-----------|---------------------------|--------------------------------|
| H446      | 0.5                       | 0.011                          | COR-L47   | 1.7                       | nd                             |
| SCLC-21H  | 0.19                      | 0.014                          | COR-L88   | > 20                      | nd                             |
| H2066     | 0.23                      | 0.015                          | CPC-N     | 2.97                      | nd                             |
| H1876     | 0.44                      | 0.027                          | DMS-273   | 0.15                      | nd                             |
| COR-L311  | 0.495                     | 0.037                          | DMS454    | 8                         | nd                             |
| H187      | 0.74                      | 0.039                          | DMS53     | 1                         | nd                             |
| H2227     | 1                         | 0.05                           | DMS79     | > 20                      | nd                             |
| H211      | 1.1                       | 0.055                          | H1092     | > 20                      | nd                             |
| H2171     | 0.82                      | 0.057                          | H1341     | 1                         | nd                             |
| COR-L279  | 0.54                      | 0.064                          | H146      | 0.67                      | nd                             |
| H1694     | 0.74                      | 0.104                          | H1882     | > 20                      | nd                             |
| H64       | 3.8                       | 0.18                           | H196      | > 20                      | nd                             |
| H1417     | 2                         | 0.203                          | H1963     | 0.83                      | nd                             |
| H524      | 3.5                       | 0.318                          | H2081     | 17                        | nd                             |
| H209      | 1.2                       | 0.5                            | H2107     | 5.1                       | nd                             |
| DMS114    | 1.5                       | 0.74                           | H345      | > 20                      | nd                             |
| H2029     | 4.7                       | 0.74                           | H526      | 0.75                      | nd                             |
| H2141     | 7.84                      | 0.805                          | H69       | 1.8                       | nd                             |
| H1436     | 20                        | 3                              | H82       | 0.74                      | nd                             |
| H1930     | 14.5                      | 3.83                           | H889      | > 20                      | nd                             |
| H2196     | 16                        | 4.55                           | HCC-33    | 1.6                       | nd                             |
| H510A     | 10                        | 4.55                           | SBC3      | 0.6                       | nd                             |
| H378      | 6.6                       | 4.94                           | SBC5      | >20                       | nd                             |
| COLO-668  | > 20                      | 5.58                           | SCLC-22H  | 0.44                      | nd                             |
| H1105     | > 10                      | 10.7                           |           |                           |                                |
| H1048     | > 20                      | 15.5                           |           |                           |                                |
| H1836     | > 20                      | 16.9                           |           |                           |                                |
| H841      | >20                       | >20                            |           |                           |                                |

nd, not determined

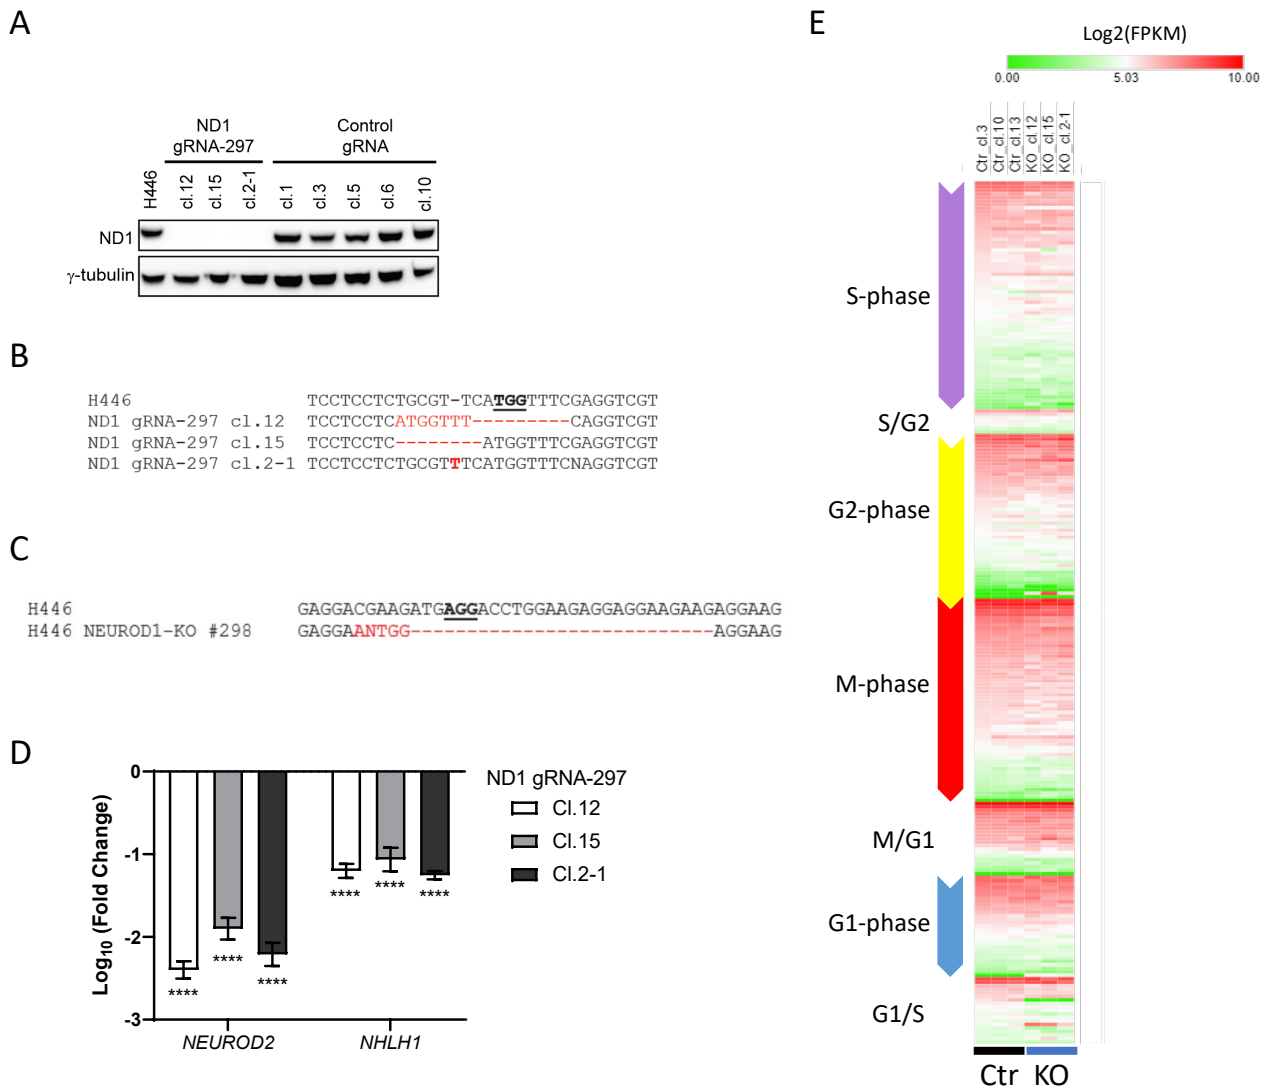

**Supplemental Figure S1. Knockout of NEUROD1 by CRISPR in H446 cells. A)** Western blots show a complete loss of NEUROD1 protein expression in three NEUROD1-KO clones (cl. 12, cl. 15, and cl. 2-1) receiving the gRNA #297. **B-C)** Sanger sequencing identified indels (highlighted in red) near PAM sequences (underlined) in the NEUROD1's coding sequence in the KO clones receiving the gRNA #297 (B) or the gRNA #298 (C). **D)** Expression of two NEUROD1-target genes (*NEUROD2* and *NHLH1*) in three H446 NEUROD1-KO clones (gRNA-297: cl. 12, cl. 15, and cl. 2-1) as measured by quantitative real-time PCR. **E)** A heatmap comparing the expression of cell-cycle signature genes (27) among H446 NEUROD1-KO and control cell clones (three clones for each group). Ctr, control; gRNA, guide RNA; KO, knockout; ND1, NEUROD1.

A

| Rank | Motif                                                                             | P-value  | log P-pvalue | % of Targets | Best Match      |
|------|-----------------------------------------------------------------------------------|----------|--------------|--------------|-----------------|
| 1    |  | 1e-18233 | -4.199e+04   | 73.08%       | NEUROG2/NEUROD1 |
| 2    |  | 1e-3487  | -8.031e+03   | 46.82%       | NFIX            |
| 3    |  | 1e-664   | -1.530e+03   | 7.58%        | JunB            |
| 4    |  | 1e-556   | -1.282e+03   | 8.39%        | ASCL1           |
| 5    |  | 1e-521   | -1.201e+03   | 21.82%       | FOXA1           |
| 6    |  | 1e-205   | -4.742e+02   | 13.85%       | EMX2            |

B

NEUROD1-occupied peaks

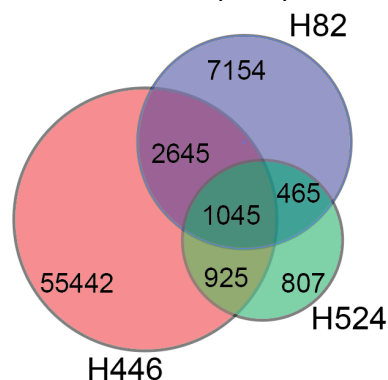

**Supplemental Figure S2. Validation of the H446 NEUROD1 ChIP-seq. A)** The top six motifs identified in the genomic sequences corresponding to the NEUROD1 peaks in H446 control cells. De novo motif discovery analysis was performed using the Homer. **B)** Comparison of the NEUROD1-occupied peaks among H446, H82, and H524 cells. The raw data files of NEUROD1 ChIP-seq in H82 (GSM1700641) and H524 (GSM1700642) were downloaded from NCBI GEO archive, and the NEUROD1-occupied peaks were identified using MACS. The overlaps of the NEUROD1 peaks among these SCLC-N lines were analyzed using the Homer.

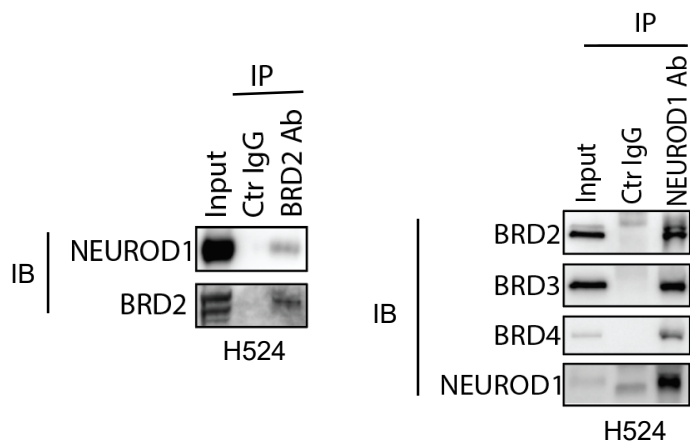

**Supplemental Figure S3. BET bromodomain proteins interact with NEUROD1 in H524 cells.** Nuclear extracts from H524 cells were subject to BRD2 (left) or NEUROD1 (right) immunoprecipitation (IP), and the presence of NEUROD1 (left) and BET bromodomain proteins (right) in the elute was detected by immunoblotting (IB). Ab, antibody.

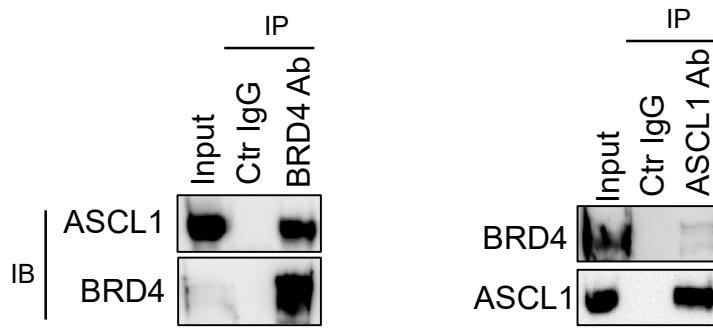

**Supplemental Figure S4. BRD4 interacts with ASCL1 in H1963 cells.** Nuclear extracts from H1963 cells were subject to BRD4 (left) or ASCL1 (right) immunoprecipitation (IP), and the presence of ASCL1 (left) and BRD4 (right) in the elute was detected by immunoblotting (IB). Ab, antibody.

A

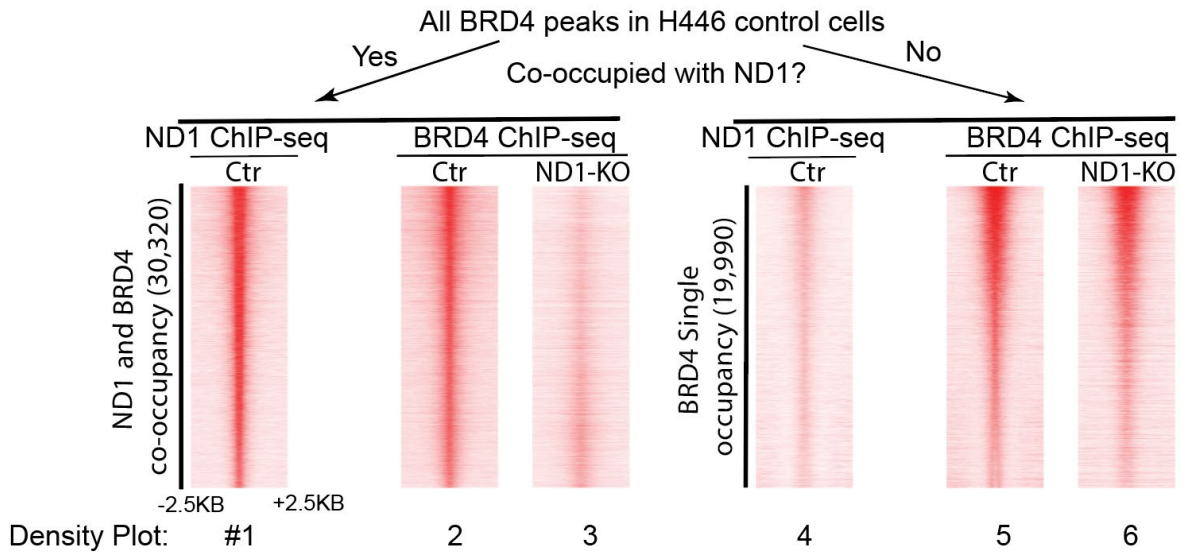

B

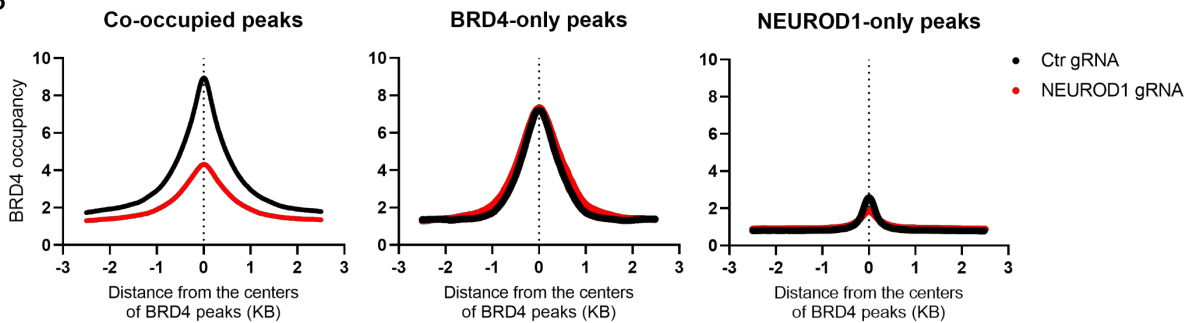

**Supplemental Figure S5. NEUROD1 KO affects the BRD4 occupancy only in the genomic regions co-occupied by NEUROD1.** A) BRD4 peaks in H446 control cells were separated into two groups on the basis of NEUROD1 (ND1) co-occupancy (density plot #1 vs. #4). NEUROD1 KO affected BRD4 occupancy in the NEUROD1/BRD4-cooccupied genomic regions (#2 vs. #3) but not in the BRD4 singly-occupied areas (#5 vs. #6). B) Aggregate signal plots showing the effects of NEUROD1 KO on BRD4 occupancy in the genomic regions co-occupied by NEUROD1 and BRD4 (left), singly occupied by BRD4 (middle), and singly occupied by NEUROD1 (right).

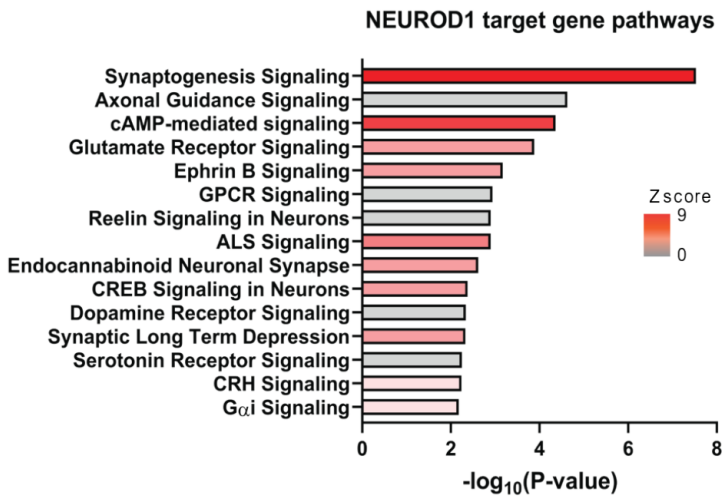

**Supplemental Figure S6. Neuronal-related pathways are enriched among the NEUROD1-target genes in H446 cells.** The top 15 pathways enriched among the NEUROD1-target genes as identified by the Ingenuity Pathway Analysis (RRID:SCR\_008653). ALS, amyotrophic lateral sclerosis; CREB, cAMP response element-binding protein; CRH, corticotrophin-releasing hormone; GPCR, G protein coupled receptor.



## SCLC lines in CCLE

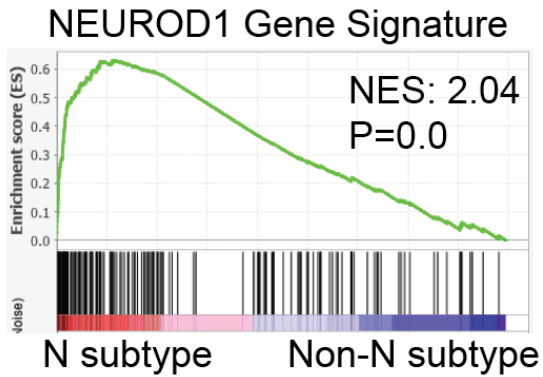

**Supplemental Figure S7. Validation of the NEUROD1 gene signature using the SCLC RNA-seq dataset in the CCLE.** A GSEA plot showing enrichment of the NEUROD1 gene signature in the SCLC-N cell lines (N subtype) compared to all other SCLC lines (non-N subtype) in the Cancer Cell Line Encyclopedia (CCLE, RRID:SCR\_013836). NES, normalized enrichment score.

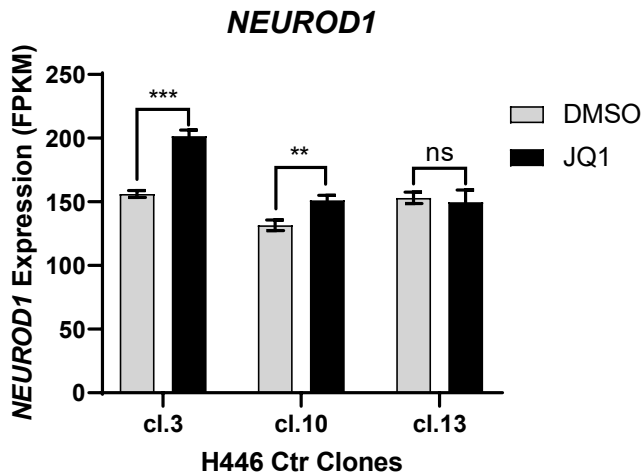

**Supplemental Figure S8. Effects of BETi on NEUROD1 gene expression in H446 cells.** The bar graph shows the transcript levels of *NEUROD1* in three H446 control clones following JQ1 treatment (1  $\mu$ M, 24 hrs). The data were extracted from the RNA-seq dataset shown in Figure 3C and Supplemental Figure S1E. The significance of the two-group comparison was determined using the Student's t-test with multiple test correction through a false discovery rate approach. \*\*,  $P < 0.01$ ; \*\*\*,  $P < 0.001$ ; ns, not significant. Ctr, control; FPKM, Fragments Per Kilobase of transcript per Million mapped reads.

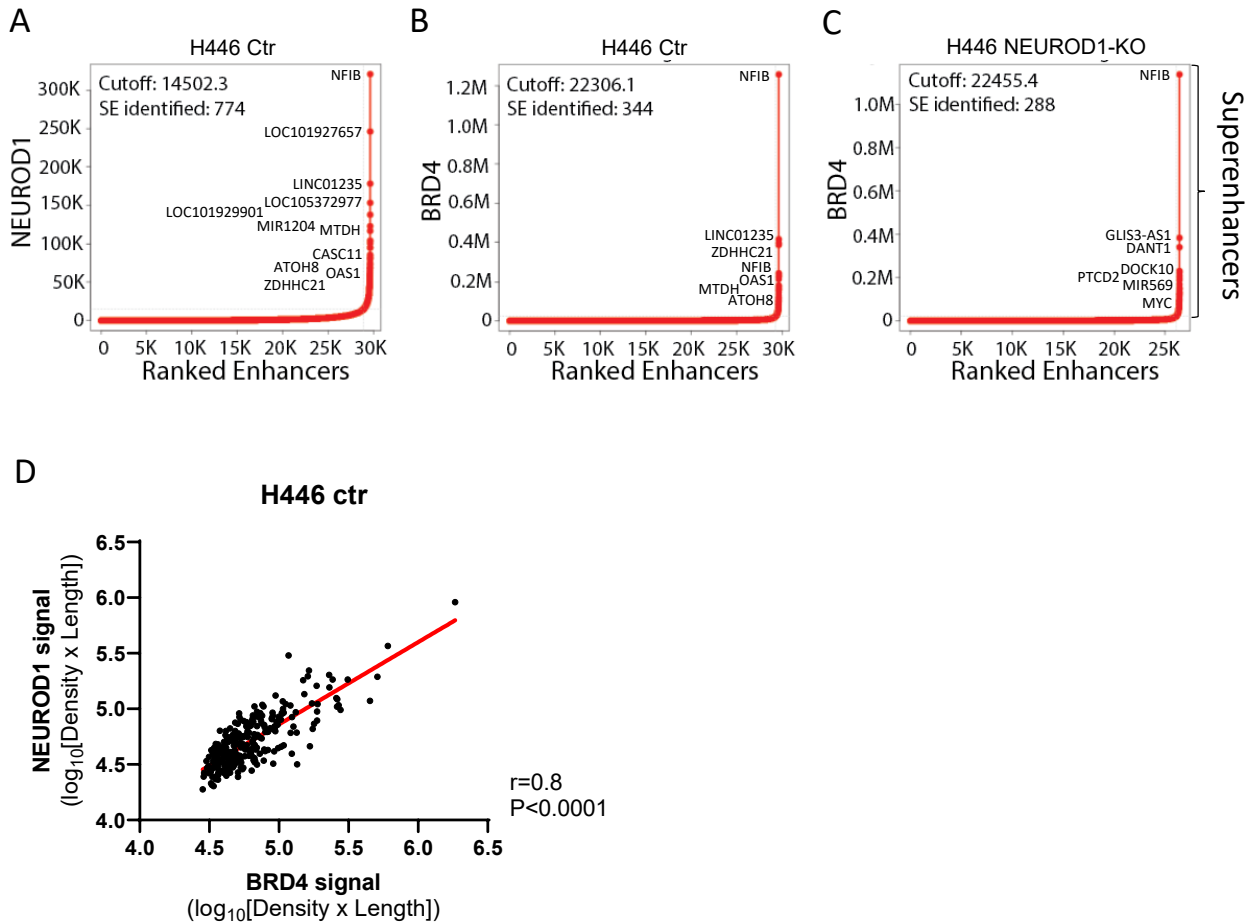

**Supplemental Figure S9. The NEUROD1- and BRD4-loaded SEs identified in H446 control and NEUROD1-KO cells and their correlation. A-B)** Stacked NEUROD1 (A) and BRD4 (B) enhancers in an increasing rank order on the basis of ChIP-seq signal minus the input signal in H446 control cells. **C)** Stacked BRD4 enhancers in an increasing rank order in the H446 NEUROD1-KO cells. **D)** Correlation between NEUROD1 and BRD4 signals (Density x Length) at the SEs co-occupied by these two genes in the H446 control cells. Pearson correlation coefficient ( $r$ ) and P value were shown.

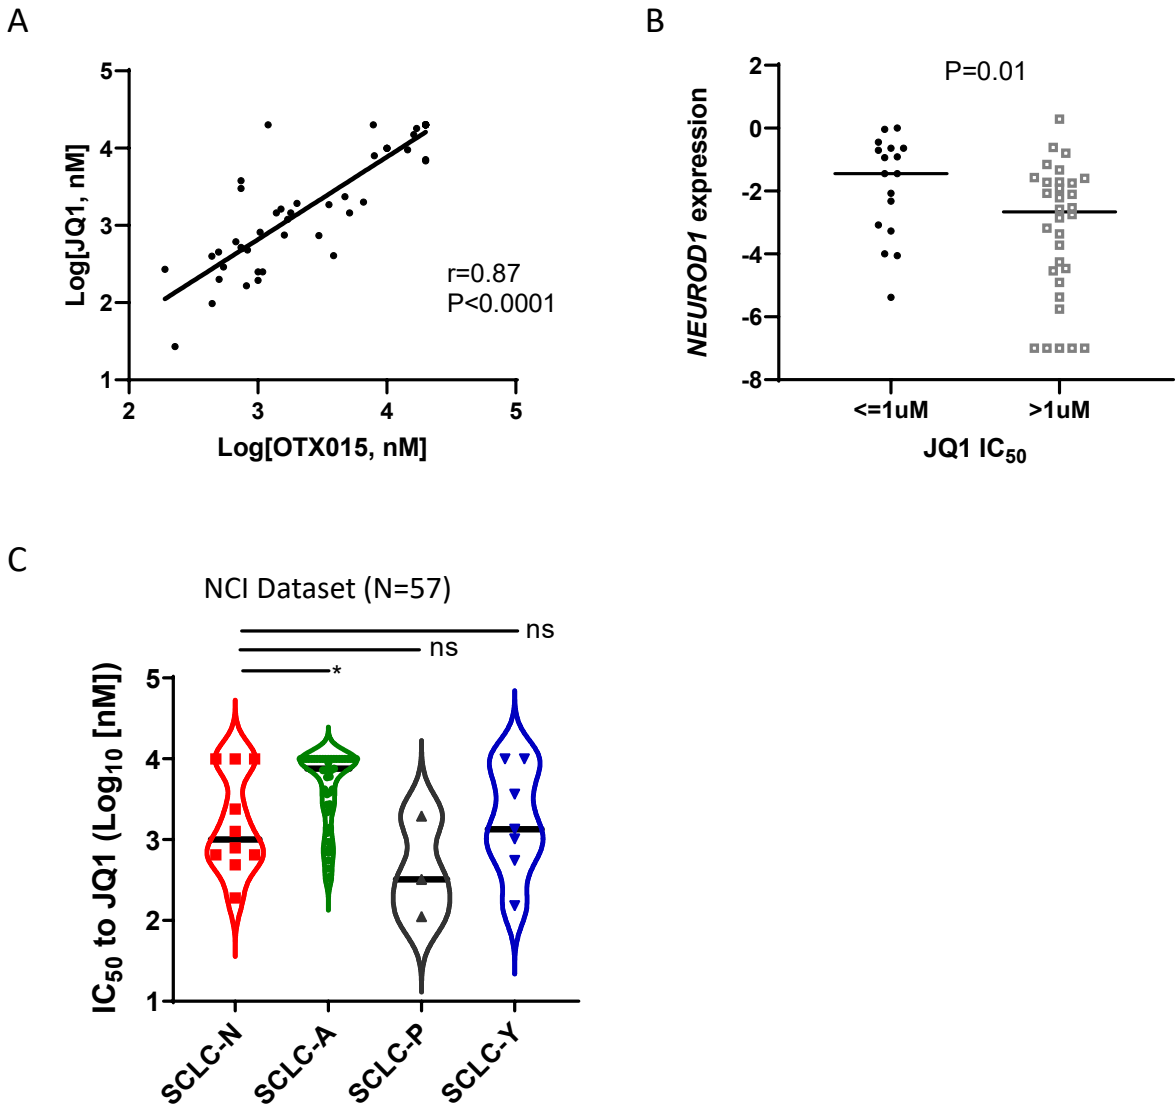

**Supplemental Figure S10. The SCLC-N lines are more susceptible to BETi. A)** Correlation between the  $IC_{50}$  values of OTX-015 and JQ1 in SCLC cell lines (N=50). Pearson correlation coefficient (r) and P value were shown. **B)** A comparison of *NEUROD1* expression between the JQ1-sensitive and -resistant SCLC lines (N=52) with the cutoff of  $IC_{50} = 1 \mu\text{M}$  JQ1. **C)** Comparison of JQ1 sensitivity ( $IC_{50}$ ) among the four molecular subtypes of SCLC cell lines (N=57) in a public high-throughput drug screen dataset (30). The significance of the two-group comparisons was determined using the Student's t-test (B) or the ANOVA test with Dunnett's multiple test correction (C). \*,  $P<0.05$ ; ns: not significant.

A

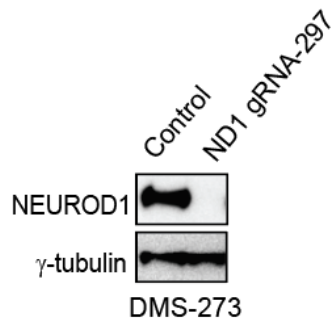

B

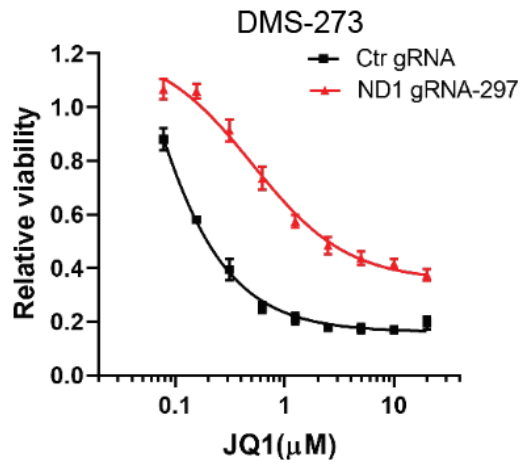

**Supplemental Figure S11. NEUROD1 KO renders DMS-273 cells resistant to BETi.** **A)** Immunoblots showing loss of NEUROD1 in DMS-273 cells after CRISPR gene editing. **B)** Viability of the DMS-273 NEUROD1-KO cells versus the control cells after JQ1 treatment (72 hrs). Error bars represent the SD of four replicates. Ctr, control; gRNA, guide RNA.

A

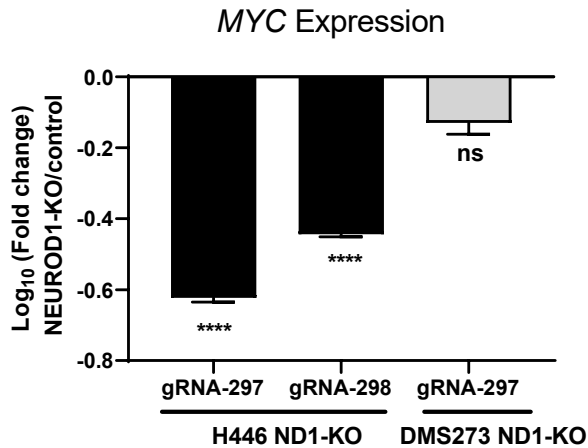

B

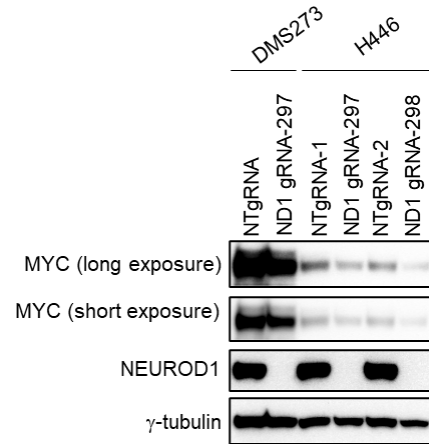

C

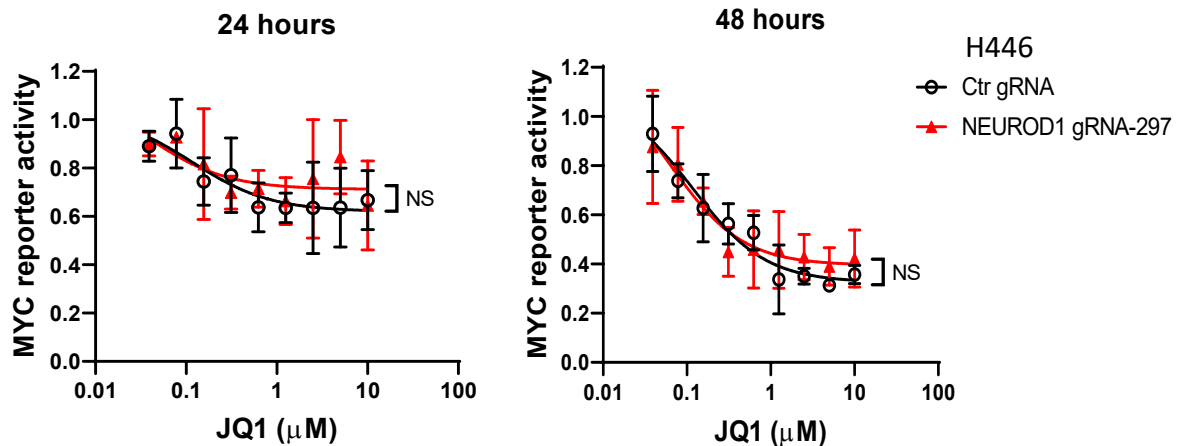

**Supplemental Figure S12. Effects of NEUROD1 KO on MYC expression and transactivation. A-B)** NEUROD1 KO modestly decreased MYC gene (A) and protein expression (B) in the H446 but not in DMS 273 cells. **C)** JQ1 suppressed MYC transactivation to a similar degree in H446 NEUROD1-KO and control cells (left, 24-hr time interval; right, 48-hr time interval).

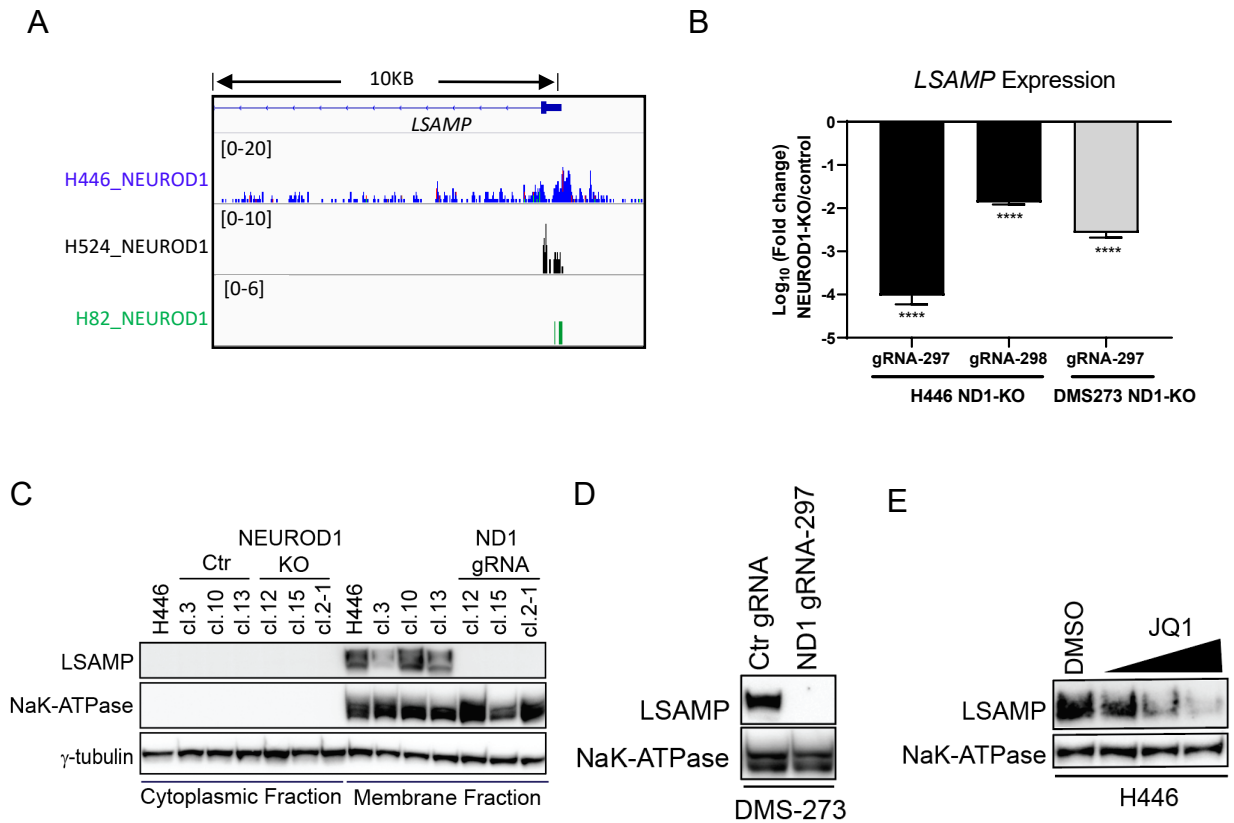

**Supplemental Figure S13. LSAMP expression is regulated by both NEUROD1 and BET bromodomain proteins. A)** Integrated Genomics Viewer (IGV) snapshots showing NEUROD1 occupancy at the TSS site of LSAMP gene in H446, H82 (GSM1700641) and H524 (GSM1700642). **B)** A drastic decrease of LSAMP gene expression in the H446 and DMS-273 cells upon KO of NEUROD1. The gene expression was measured by qRT-PCR and plotted relative to control cells. **C)** LSAMP protein is present only in the membrane-bound protein fractions of H446 control cells but not in the NEUROD1-KO cells. **D)** Loss of LSAMP protein expression in DMS-273 cells upon KO of NEUROD1. **E)** A dose-dependent decrease of LSAMP protein expression in H446 cells 24 hours after JQ1 treatment (0.25, 0.5, and 1  $\mu$ M).

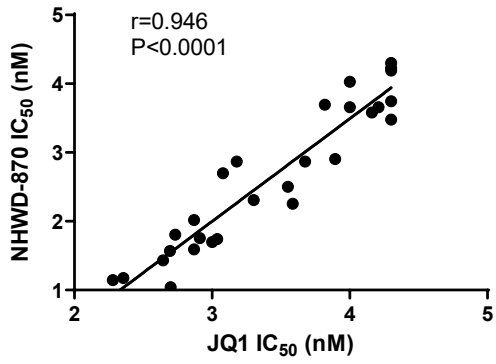

**Supplemental Figure S14. Correlation between the IC<sub>50</sub> values of NHWD-870 and JQ1 in SCLC cell lines (N=28).** Pearson correlation coefficient (r) and P value were shown.
